# Supplementary material
Source: PubMed Central journal article supplement (PMC7193834)
Supplement: plantbiotechnology-37-1-19.1227a-s001.pdf [file plantbiotechnology-37-1-19.1227a-s001.pdf]

## Supplementary Figure S1

60 dpi

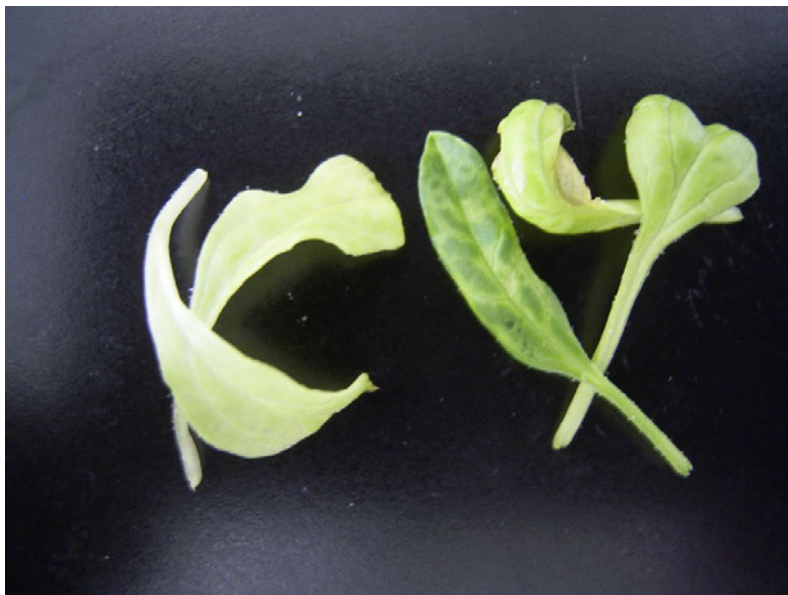

**'All Right'**

**'Surprise'**

## Supplementary Figure S2

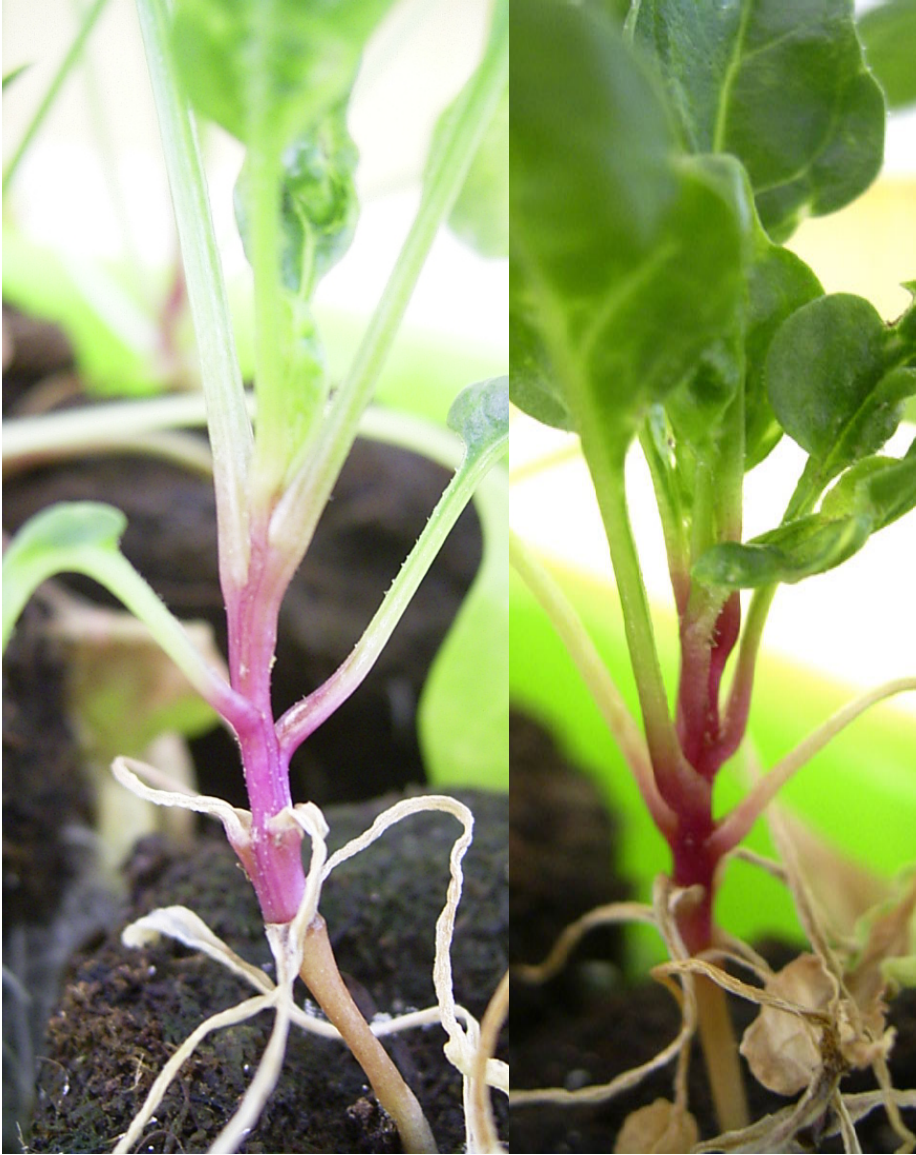

Healthy

L1A1L3

# Supplementary Figure S3

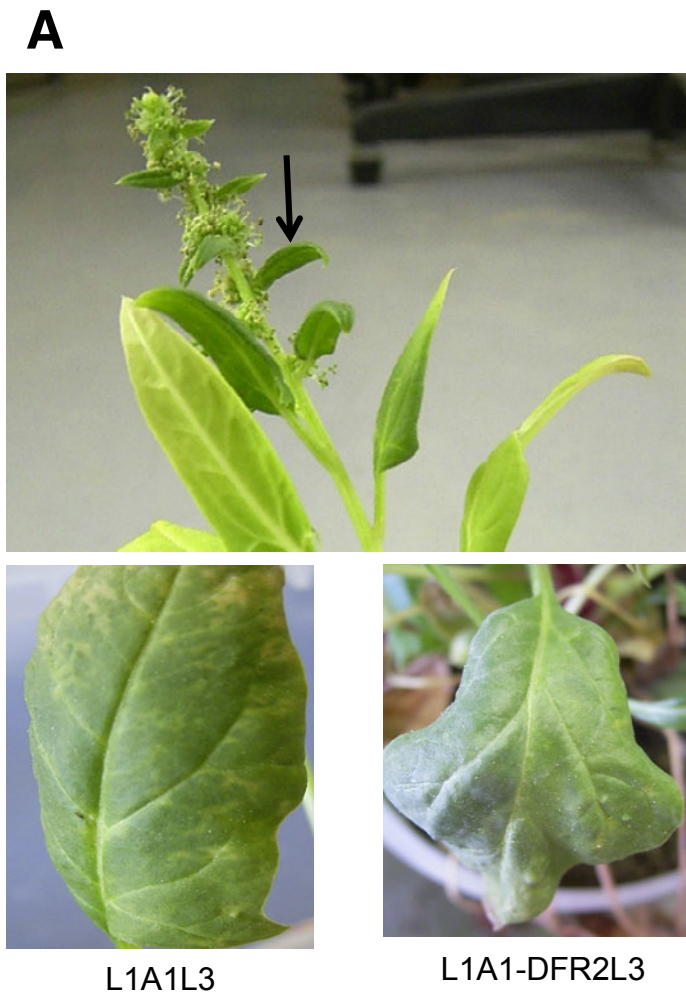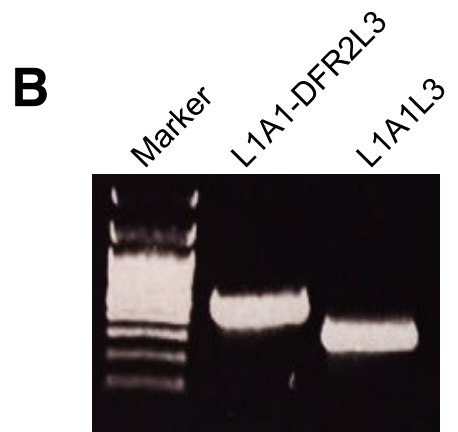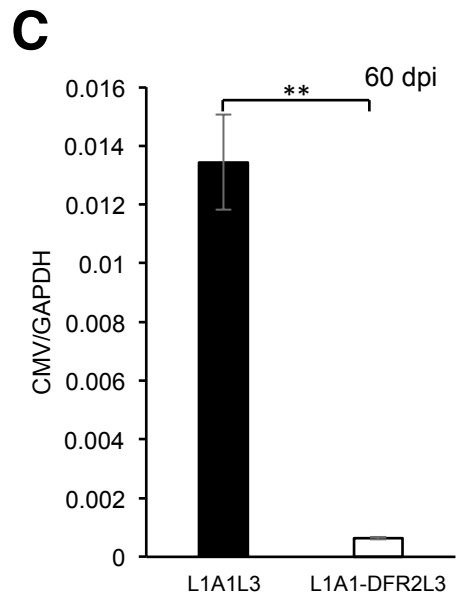

**Supplementary Table S1.** Primers used for construction of CMV-VIGS clones and real-time RT-PCR.

| Primer                         | Primer sequence (5'–3')                                             | Purpose                          |
|--------------------------------|---------------------------------------------------------------------|----------------------------------|
| Spi-PDS-5-MI2<br>Spi-PDS-3-St2 | CGCACGCGTCTTATGACCATCTACTATTC<br>CGAGGCCTGATCCATTCTTCTGCAGGTGCA     | Construction of CMV-A1-PDS clone |
| Sp-DFR-5-2-MI<br>Sp-DFR-3-2-St | CGCACGCGTCAAGGACTTCGAAGAGGATATG<br>CGAGGCCTGACCTTTGTTCTGCAAGTATCAAC | Construction of CMV-A1-DFR clone |
| Sp-PDS-5-100<br>Sp-PDS-3-100   | CAAGCCTGGTGAATTTAGCC<br>GCAGGCAAGAGACCAATAGC                        | Real-time RT-PCR for PDS         |
| Sp-DFR-5-1<br>Sp-DFR-3-1       | GGCTCATGGCTTGTCAAGAGG<br>CATAGTGTCAAGTGAGTGTTTG                     | Real-time RT-PCR for DFR         |
| CMV-DET-5-340<br>CMV-DET-3-340 | GTTGACGTCGAGCACCAACGC<br>TGGTCTCCTTTTGGAGGCC                        | Real-time RT-PCR for CMV         |
| Sp-GAPDH-5<br>Sp-GAPDH-3       | TGTGTGCGACATCCCCCTCGTGTC<br>CCACCCGTTGGCTGTAACCCCACTCAT             | Real-time RT-PCR for reference   |
| 2b-5-up<br>R2-2814-R2          | GTACAGAGTTCAGGGTTGAGCG<br>AGCAATACTGCCAACTCAGCTCC                   | RT-PCR for insert check          |
